# Supplementary material for: Deep learning supported discovery of biomarkers for clinical prognosis of liver cancer
Source: Research Square preprint supplement (doi:10.21203/rs.3.rs-1452983/v1), 2024-03-19
Supplement: Supplementary file 1 [file 9fbac28ee21ba945d0346deb.xlsx]

## Sheet: Liang_Supplementary_Table_1
Supplementary Table 1. Univariable and multivariable analyses of factors associated with survival, and MacroNet risk score for QHCG dataset. P values and confidence intervals (CIs) according to Cox proportional hazards model.
		Univariable		Multivariable (MacroNet)
Variable		P Value		HR		95%CI			P Value
Risk score (high vs low)		2.08e-05		6.5563		2.01254	21.3587		0.0018046
Age (>60 vs ≤60 years)		0.897865		-		-	-		-
Gender (female vs male)		0.326478		-		-	-		-
AFP (>20 vs ≤20 ng/mL)		0.0218582		3.52805		0.723685	17.1996		0.118797
Tumour size (>5 vs ≤5 cm)		0.00210158		1.09635		0.960737	1.25111		0.172121
Tumour number (multiple vs single)		0.0922539		1.30668		0.718055	2.37782		0.381205
Liver cirrhosis (yes vs no)		0.728755		-		-	-		-
Satellite stove (yes vs no)		0.000539558		5.16166		1.57944	16.8685		0.00659833
MVI (yes vs no)		0.0135735		0.834361		0.314568	2.21306		0.715966
BDT (yes vs no)		0.0527067		3.61641		0.928619	14.0837		0.0638535
Stage (III-IV vs I-II)		0.916908		-		-	-		-
TIL (high vs low)		0.0392155		1.05856		0.281992	3.9737		0.932798

## Sheet: Liang_Supplementary_Table_2
Supplementary Table 2. Univariable and multivariable analyses of factors associated with survival, and MacroNet risk score for TCGA dataset. P values and confidence intervals (CIs) according to Cox proportional hazards model
		Univariable		Multivariable (MacroNet)
Variable		P Value		HR		95%CI			P Value
Risk score (high vs low)		6.65955e-07		2.20542		1.25846	3.86493		0.0057257
Age (>60 vs ≤60 years)		0.187356		-		-	-		-
Gender (female vs male)		0.133128		-		-	-		-
Stage (III-IV vs I-II)		4.53208e-06		2.06448		1.38526	3.07673		0.000369703
TIL (high vs low)		0.00113024		0.675798		0.443858	1.02894		0.0677068
Prior malignancy (yes vs no)		0.66766		-		-	-		-

## Sheet: Liang_Supplementary_Table_3
Supplementary Table 3. Univariable and multivariable analyses of factors associated with survival, and MicroNet risk score for QHCG dataset. P values and confidence intervals (CIs) according to Cox proportional hazards model
		Univariable		Multivariable(MicroNet)
Variable		P Value		HR		95%CI			P Value
Risk score (high vs low)		0.00112582		4.12755		1.47697	11.5349		0.00685631
Age (>60 vs ≤60 years)		0.897865		-		-	-		-
Gender (female vs male)		0.326478		-		-	-		-
AFP (>20 vs ≤20 ng/mL)		0.0218582		2.32265		0.488171	11.0509		0.289643
Tumour size (>5 vs ≤5 cm)		0.00210158		1.05614		0.93733	1.19001		0.369691
Tumour number (multiple vs single)		0.0922539		1.30423		0.687856	2.47293		0.41582
Liver cirrhosis (yes vs no)		0.728755		-		-	-		-
Satellite stove (yes vs no)		0.000539558		4.24576		1.16419	15.4842		0.0285064
MVI (yes vs no)		0.0135735		1.62902		0.619584	4.28307		0.322476
BDT (yes vs no)		0.0527067		4.64369		1.15927	18.6014		0.0301061
Stage (III-IV vs I-II)		0.916908		-		-	-		-
TIL (high vs low)		0.0392155		0.715749		0.201339	2.54445		0.605305

## Sheet: Liang_Supplementary_Table_4
Supplementary Table 4. Univariable and multivariable analyses of factors associated with survival, and M2MNet risk score for QHCG dataset. P values and confidence intervals (CIs) according to Cox proportional hazards model.
		Univariable		Multivariable(M2MNet)
Variable		P Value		HR		95%CI			P Value
Risk score (high vs low)		0.000139324		7.4828		2.09786	26.6902		0.00192292
Age (>60 vs ≤60 years)		0.897865		-		-	-		-
Gender (female vs male)		0.326478		-		-	-		-
AFP (>20 vs ≤20 ng/mL)		0.0218582		2.22924		0.455602	10.9076		0.322387
Tumour size (>5 vs ≤5 cm)		0.00210158		1.05202		0.936134	1.18226		0.394391
Tumour number (multiple vs single)		0.0922539		1.20206		0.628087	2.30054		0.578427
Liver cirrhosis (yes vs no)		0.728755		-		-	-		-
Satellite stove (yes vs no)		0.000539558		4.40626		1.25023	15.5292		0.0210302
MVI (yes vs no)		0.0135735		1.96888		0.715619	5.41698		0.18953
BDT (yes vs no)		0.0527067		4.70466		1.16762	18.9564		0.0294123
Stage (III-IV vs I-II)		0.916908		-		-	-		-
TIL (high vs low)		0.0392155		1.2691		0.123431	13.0488		0.841143

## Sheet: Liang_Supplementary_Table_5
Supplementary Table 5. Univariable and multivariable analyses of factors associated with survival, and MicroNet risk score for TCGA dataset. P values and confidence intervals (CIs) according to Cox proportional hazards model.
		Univariable		Multivariable(MicroNet)
Variable		P Value		HR		95%CI			P Value
Risk score (high vs low)		5.43588e-10		3.15229		2.03035	4.89418		3.1336e-07
Age (>60 vs ≤60 years)		0.187356		-		-	-		-
Gender (female vs male)		0.133128		-		-	-		-
Stage (III-IV vs I-II)		4.53208e-06		1.91429		1.29987	2.81913		0.00100935
TIL (high vs low)		0.00113024		0.714039		0.481801	1.05822		0.09334
Prior malignancy (yes vs no)		0.66766		-		-	-		-

## Sheet: Liang_Supplementary_Table_6
Supplementary Table 6. Univariable and multivariable analyses of factors associated with survival, and M2MNet risk score for TCGA dataset. P values and confidence intervals (CIs) according to Cox proportional hazards model.
		Univariable		Multivariable(M2MNet)
Variable		P Value		HR		95%CI			P Value
Risk score (high vs low)		1.47647e-09		3.1702		2.08178	4.82767		7.57442e-08
Age (>60 vs ≤60 years)		0.187356		-		-	-		-
Gender (female vs male)		0.133128		-		-	-		-
Stage (III-IV vs I-II)		4.53208e-06		2.10303		1.43105	3.09056		0.000153892
TIL (high vs low)		0.00113024		0.654708		0.443891	0.965647		0.0326572
Prior malignancy (yes vs no)		0.66766		-		-	-		-

## Sheet: Liang_Supplementary_Table_7
Supplementary Table 7. Univariable and multivariable analyses of factors associated with survival, NEC, TND, and MacroNet risk score for QHCG dataset. P values and confidence intervals (CIs) according to Cox proportional hazards model.
		Univariable		Multivariable (NEC)							Multivariable (TND)							Multivariable (Risk score)
Variable		P Value		HR		95%CI			P Value		HR		95%CI			P Value		HR		95%CI			P Value
NEC (high vs low)		0.000195736		4.65952		1.76846	12.2768		0.0018498		-		-	-		-		-		-	-		-
TND (high vs low)		0.00184486		-		-	-		-		6.67331		2.36238	18.8509		0.000340308		-		-	-		-
Risk score (high vs low)		2.08e-05		-		-	-		-		-		-	-		-		6.5563		2.01254	21.3587		0.0018046
Age (>60 vs ≤60 years)		0.897865		-		-	-		-		-		-	-		-		-		-	-		-
Gender (female vs male)		0.326478		-		-	-		-		-		-	-		-		-		-	-		-
AFP (>20 vs ≤20 ng/mL)		0.0218582		2.81609		0.601336	13.1879		0.188738		3.45144		0.743229	16.0279		0.113834		3.52805		0.723685	17.1996		0.118797
Tumour size (>5 vs ≤5 cm)		0.00210158		1.10081		0.983217	1.23247		0.0956477		1.11362		0.995145	1.2462		0.0607712		1.09635		0.960737	1.25111		0.172121
Tumour number (multiple vs single)		0.0922539		1.53268		0.828316	2.83599		0.173818		1.49331		0.787917	2.83022		0.218975		1.30668		0.718055	2.37782		0.381205
Liver cirrhosis (yes vs no)		0.728755		-		-	-		-		-		-	-		-		-		-	-		-
Satellite stove (yes vs no)		0.000539558		3.81646		1.13617	12.8196		0.0302747		5.27929		1.42971	19.4941		0.0125494		5.16166		1.57944	16.8685		0.00659833
MVI (yes vs no)		0.0135735		0.9976		0.378619	2.62851		0.996122		1.37899		0.546579	3.4791		0.496134		0.834361		0.314568	2.21306		0.715966
BDT (yes vs no)		0.0527067		2.45385		0.647307	9.30219		0.186746		6.71028		1.51296	29.7614		0.0122522		3.61641		0.928619	14.0837		0.0638535
Stage (III-IV vs I-II)		0.916908		-		-	-		-		-		-	-		-		-		-	-		-
TIL (high vs low)		0.0392155		0.577598		0.170798	1.9533		0.377265		0.979302		0.272999	3.51294		0.974398		1.05856		0.281992	3.9737		0.932798

## Sheet: Liang_Supplementary_Table_8
Supplementary Table 8. Univariable and multivariable analyses of factors associated with survival, NEC, TND, and MacroNet risk score for TCGA dataset. P values and confidence intervals (CIs) according to Cox proportional hazards model
		Univariable		Multivariable (NEC)							Multivariable (TND)							Multivariable (Risk score)
Variable		P Value		HR		95%CI			P Value		HR		95%CI			P Value		HR		95%CI			P Value
NEC (high vs low)		0.000121583		1.80141		1.13027	2.87105		0.013328		-		-	-		-		-		-	-		-
TND (high vs low)		7.57331e-07		-		-	-		-		2.9975		1.56442	5.74335		0.000936856		-		-	-		-
Risk score (high vs low)		6.65955e-07		-		-	-		-		-		-	-		-		2.20542		1.25846	3.86493		0.0057257
Age (>60 vs ≤60 years)		0.187356		-		-	-		-		-		-	-		-		-		-	-		-
Gender (female vs male)		0.133128		-		-	-		-		-		-	-		-		-		-	-		-
Stage (III-IV vs I-II)		4.53208e-06		2.10782		1.41822	3.13272		0.000225824		2.10056		1.41462	3.1191		0.00023361		2.06448		1.38526	3.07673		0.000369703
TIL (high vs low)		0.00113024		0.58402		0.396901	0.859354		0.00635053		0.602231		0.407977	0.888977		0.0107028		0.675798		0.443858	1.02894		0.0677068
Prior malignancy (yes vs no)		0.66766		-		-	-		-		-		-	-		-		-		-	-		-

## Sheet: Liang_Supplementary_Table_9
Supplementary Table 9. Univariable and multivariable analyses of factors associated with recurrence, NEC, TND, and MacroNet risk score for QHCG dataset. P values and confidence intervals (CIs) according to Cox proportional hazards model.
		Univariable		Multivariable (NEC)							Multivariable (TND)							Multivariable (Risk score)
Variable		P Value		HR		95%CI			P Value		HR		95%CI			P Value		HR		95%CI			P Value
NEC (high vs low)		0.00379694		3.3054		1.73404	6.30071		0.000280846		-		-	-		-		-		-	-		-
TND (high vs low)		0.00521184		-		-	-		-		2.91988		1.5235	5.59613		0.00124479		-		-	-		-
Risk score (high vs low)		0.000171252		-		-	-		-		-		-	-		-		2.72351		1.43925	5.15372		0.00207756
Age (>60 vs ≤60 years)		0.5652		-		-	-		-		-		-	-		-		-		-	-		-
Gender (female vs male)		0.335223		-		-	-		-		-		-	-		-		-		-	-		-
AFP (>20 vs ≤20 ng/mL)		0.0373592		1.46024		0.698609	3.05219		0.314186		1.63876		0.796868	3.37012		0.179365		1.27925		0.603151	2.71323		0.520876
Tumour size (>5 vs ≤5 cm)		0.0563897		-		-	-		-		-		-	-		-		-		-	-		-
Tumour number (multiple vs single)		0.0446531		1.51979		0.927525	2.49023		0.0966439		1.35679		0.834365	2.20632		0.218702		1.42704		0.892795	2.28098		0.13726
Liver cirrhosis (yes vs no)		1		-		-	-		-		-		-	-		-		-		-	-		-
Satellite stove (yes vs no)		0.000430509		4.09713		1.50187	11.177		0.00588244		4.1288		1.52273	11.195		0.00533259		2.70396		1.03908	7.0364		0.0414966
MVI (yes vs no)		0.0693481		-		-	-		-		-		-	-		-		-		-	-		-
BDT (yes vs no)		0.468946		-		-	-		-		-		-	-		-		-		-	-		-
Stage (III-IV vs I-II)		0.433579		-		-	-		-		-		-	-		-		-		-	-		-
TIL (high vs low)		0.768773		1.19188		0.464463	3.05856		0.71506		0.938689		0.361389	2.43819		0.896632		1.69406		0.644324	4.45404		0.285177
